# Supplementary material for: Drivers of Soil Bacterial Diversity in Sandy Grasslands in China
Source: Research Square preprint supplement (doi:10.21203/rs.3.rs-141689/v1), 2021-01-12
Supplement: Supplementary file 1 [file ea1fc2f14d09528691cd3127.docx]

# Drivers of soil bacterial diversity in sandy grasslands in China

Chengchen Pan1, Qi Feng1,*, Yulin Li1, Xiaoya Yu2, Shilong Ren3

1 *Northwest Institute of Eco-Environment and Resources,* *Chinese Academy of Sciences, Lanzhou, Gansu 730000, PR China*

2 *School of Tourism and Resource Environment, Qiannan Normal University for Nationalities, Duyun, Guizhou 558000, PR China*

3 *Environmental Research Institute, Shandong University, Qingdao, Shandong 266237, PR China*

*Corresponding author

E-mail address: qifeng@lzb.ac.cn (Q. Feng)


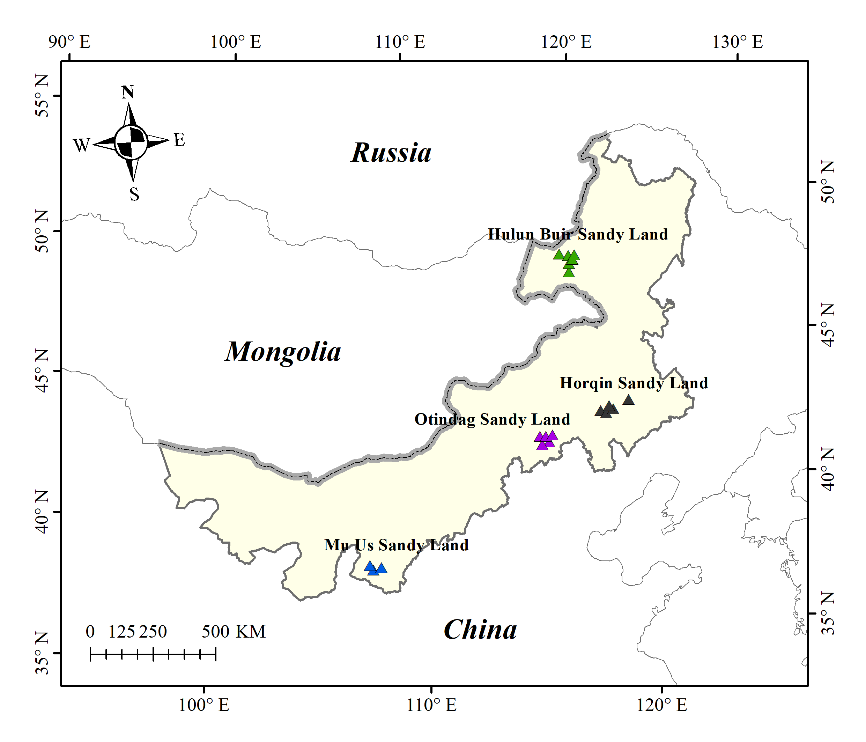


Figure S1The sampling sites across the four sandy grasslands in the Inner Mongolia of China.


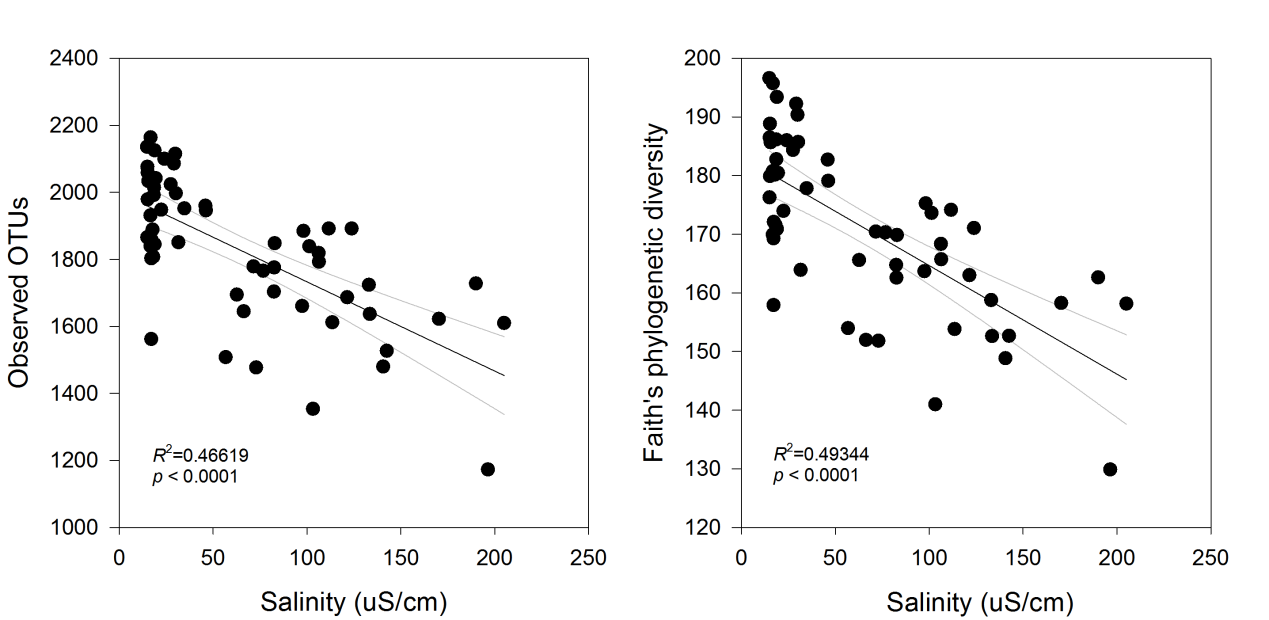


Figure S2Relationship between soilbacterial phylotyperichness and Faith’s phylogenetic diversity and soil salinity

Table S1 Pearson correlations between soil bacterial phylotype

richness and Faith’s phylogenetic diversity and vegetation and edaphic factors

|  | Phylotyperichness | Phylogenetic diversity |
| --- | --- | --- |
| SOM | 0.04 | -0.08 |
| TN | 0.1 | 0.01 |
| TP | -0.35** | -0.39** |
| AP | -0.18 | -0.28* |
| pH | -0.30* | -0.19 |
| EC | -0.68** | -0.70** |
| PR | 0.40** | 0.34** |
| PB | 0.35** | 0.24 |
| MAP | 0.25 | 0.29* |
| MAT | -0.26 | -0.16 |

MAT, mean annual temperature; MAP, mean annual precipitation; SOM, soil organic matter; TN, total nitrogen; TP, total phosphorus; AP, available phosphorus; EC, electrical conductivity; PR, plant species richness; PB, plant aboveground biomass

Table S2 Correlations of soil bacterial beta diversity with geographical distance and environment factors as revealed by Mantel test

|  | *R* | *p* |
| --- | --- | --- |
| GEODISTANCE | 0.71 | <0.001 |
| SOM | 0.17 | 0.04 |
| TN | 0.16 | 0.04 |
| TP | 0.29 | <0.001 |
| AP | 0.18 | 0.015 |
| pH | 0.55 | <0.001 |
| EC | 0.36 | <0.001 |
| PR | 0.24 | 0.002 |
| PB | 0.21 | 0.011 |
| MAP | 0.32 | <0.001 |
| MAT | 0.55 | <0.001 |

MAT, mean annual temperature; MAP, mean annual precipitation; SOM, soil organic matter; TN, total nitrogen; TP, total phosphorus; AP, available phosphorus; EC, electrical conductivity; PR, plant species richness; PB, plant aboveground biomass

Table S3 Correlation coefficients between soil bacterial groups and vegetation and soil factors

| Groups | SOM | TN | TP | AP | pH | EC | PR | PB | MAP | MAT |
| --- | --- | --- | --- | --- | --- | --- | --- | --- | --- | --- |
| Proteobacteria | -0.13 | -0.18 | -0.16 | 0.18 | -0.14 | 0.29* | 0.24 | 0.13 | 0.06 | -0.1 |
| Actinobacteria | 0.04 | 0 | -0.15 | -0.11 | -0.40** | -0.38** | 0 | 0.06 | 0.1 | -0.01 |
| Firmicutes | -0.26 | -0.26 | 0.03 | -0.04 | 0.32* | 0.22 | -0.06 | -0.29* | -0.27* | 0.03 |
| Cyanobacteria | -0.13 | -0.08 | 0.2 | -0.17 | 0.43** | 0.05 | -0.40** | -0.37** | -0.02 | 0.34* |
| Acidobacteria | 0.52** | 0.62** | 0.27* | 0.03 | 0.16 | -0.21 | -0.03 | 0.26* | 0.14 | -0.04 |
| Bacteroidetes | 0.14 | 0.25 | -0.04 | 0.03 | 0.12 | 0.01 | -0.01 | 0.2 | 0.31* | 0.11 |
| Gemmatimonadetes | 0.01 | -0.01 | -0.04 | 0.04 | -0.15 | 0.02 | 0.24 | 0.11 | -0.21 | -0.36** |
| Chloroflexi | 0.09 | 0.13 | 0.21 | -0.17 | 0.14 | -0.24 | -0.09 | 0.16 | 0.02 | 0.02 |
| Verrucomicrobia | 0.63** | 0.57** | 0.16 | 0.34** | -0.46** | -0.06 | 0.05 | 0.29* | -0.35** | -0.47** |
| unidentified_Bacteria | 0.03 | -0.06 | 0 | 0.36** | -0.31* | 0.37** | 0.12 | 0.15 | -0.19 | -0.34** |
| Armatimonadetes | -0.09 | 0.01 | 0.05 | 0.01 | 0.31* | 0.15 | -0.09 | 0.09 | 0.44** | 0.36** |
| Nitrospirae | 0.34* | 0.37** | 0.18 | 0.36** | 0.17 | 0.41** | 0.13 | 0.41** | -0.05 | -0.16 |
| Rokubacteria | 0.23 | 0.26 | 0.11 | -0.08 | 0.16 | 0.11 | 0.06 | 0.11 | -0.2 | -0.01 |
| Fibrobacteres | -0.26 | -0.25 | -0.29* | -0.21 | -0.01 | -0.28* | 0.12 | 0.07 | 0.2 | 0.08 |

MAT, mean annual temperature; MAP, mean annual precipitation; SOM, soil organic matter; TN, total nitrogen; TP, total phosphorus; AP, available phosphorus; EC, electrical conductivity; PR, plant species richness; PB, plant aboveground biomass
